# Supplementary material for: Molecular dynamics study on graphene-mediated pyrazinamide drug delivery onto the pncA protein
Source: Royal Society of Chemistry journal article supplement (doi:10.1039/c4ra01486c), 2014-01-01
Supplement: c4ra01486c1.pdf [file c4ra01486c1.pdf]

## **Supporting Information**

### **Dynamics study on graphene mediated pyrazinamide drug delivery onto pncA protein**

**Nabanita Saikia,<sup>a</sup> Anupam N. Jha<sup>b</sup> and Ramesh C. Deka<sup>\*a</sup>**

<sup>a</sup> *Department of Chemical Sciences, Tezpur University, Napaam, Tezpur-784028, Assam, India. Fax: +91 3712 267005/6; E-mail: [ramesh@tezu.ernet.in](mailto:ramesh@tezu.ernet.in)*

<sup>b</sup> *Department of Molecular Biology and Biotechnology (MBBT), Tezpur University, Assam, India*

**Table S1.** The force field parameters for carbon and hydrogen atoms used for describing graphene.

```
[ atomtypes ]
; name  mass  charge  ptype  sigma  eps
CJ  6  12.01100  0.000  A  3.55000e-01  2.92880e-01
HJ  1  1.00800  0.000  A  2.42000e-01  1.25520e-01

[bondtypes]
; i  j  func  b0  kb
CJ  CJ  1  0.14000  392459.2
CJ  HJ  1  0.10800  307105.6

[ angletypes ]
CJ  CJ  CJ  1  120.000  527.184
CJ  CJ  HJ  1  120.000  292.880
HJ  CJ  HJ  1  117.000  292.880

[ dihedraltypes ]
CJ  CJ  CJ  CJ  3  30.33400  0.00000  -30.33400  0.00000  0.00000  0.00000 ; aromatic
ring
HJ  CJ  CJ  HJ  3  30.33400  0.00000  -30.33400  0.00000  0.00000  0.00000 ; aromatic
ring
HJ  CJ  CJ  CJ  3  30.33400  0.00000  -30.33400  0.00000  0.00000  0.00000 ; aromatic
ring
```

List of Figures:

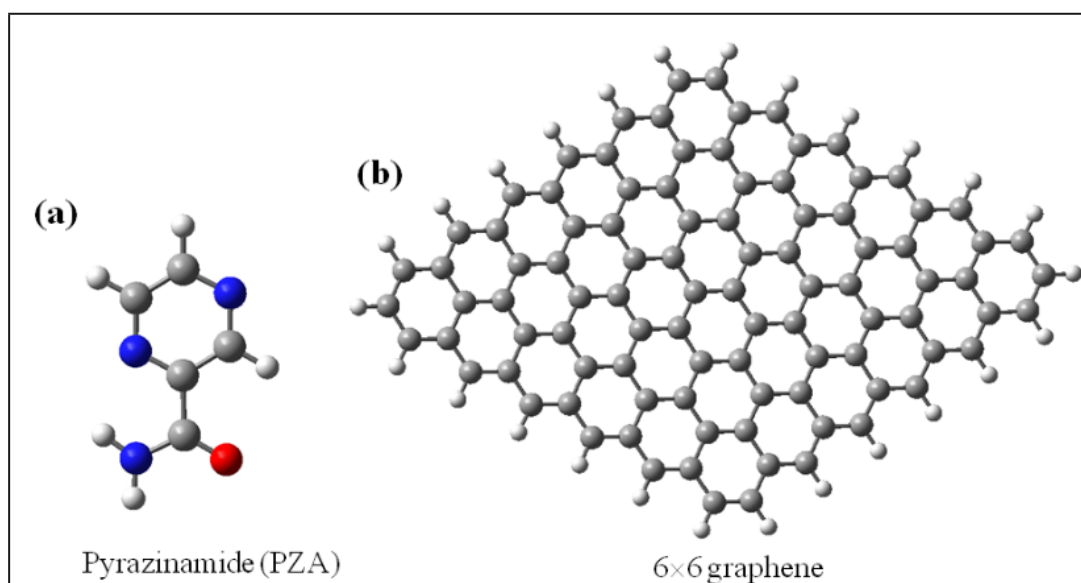

**Fig. S1.** The optimized geometries of (a) PZA, (b) 6×6 graphene.

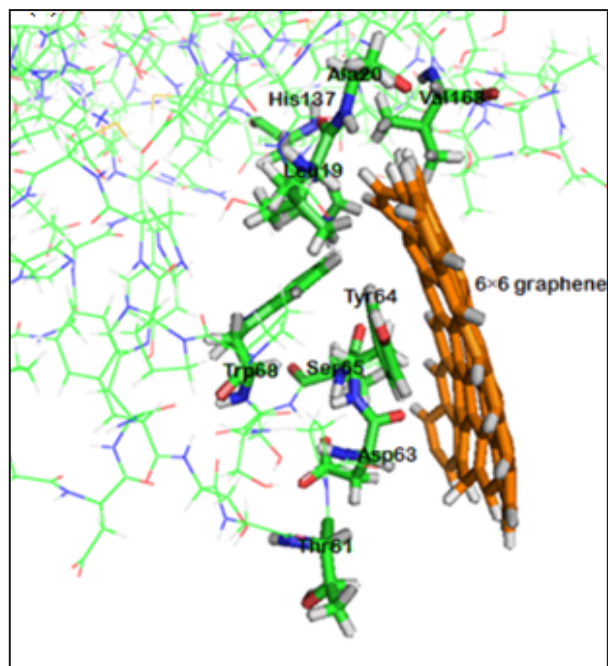

**Fig. S2.** Interaction of 6×6 graphene with some of the closely oriented ligand binding residues of pncA along the binding pathway.

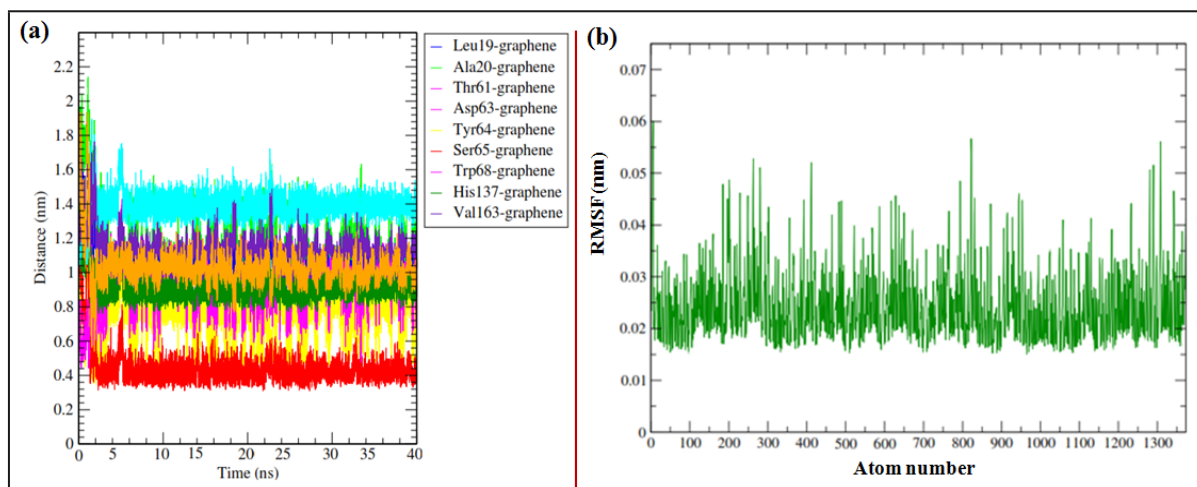

**Fig. S3.** (a) COM distance between the selected ligand binding residues of pncA (described in Fig. S2) and 6×6 graphene, (b) RMSF of non H atoms of pncA with respect to atom number of pncA atoms.

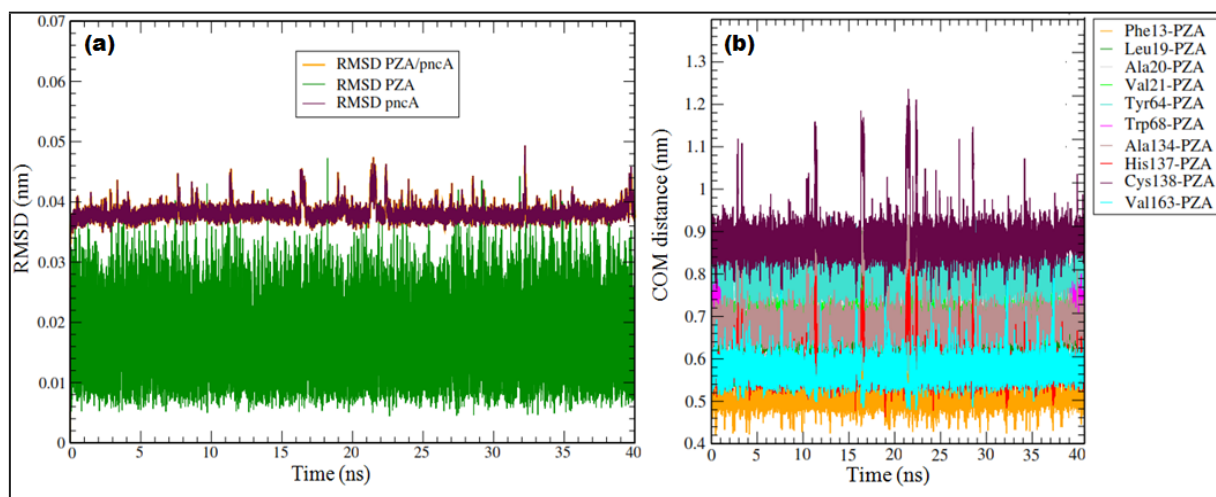

**Fig. S4.** (a) The RMSD vs. time (ns) plot for PZA, pncA and PZA/pncA combined with PZA placed along the entering pathway of pncA, (b) variation in COM distance between PZA and selected amino acid residues oriented in close proximity.

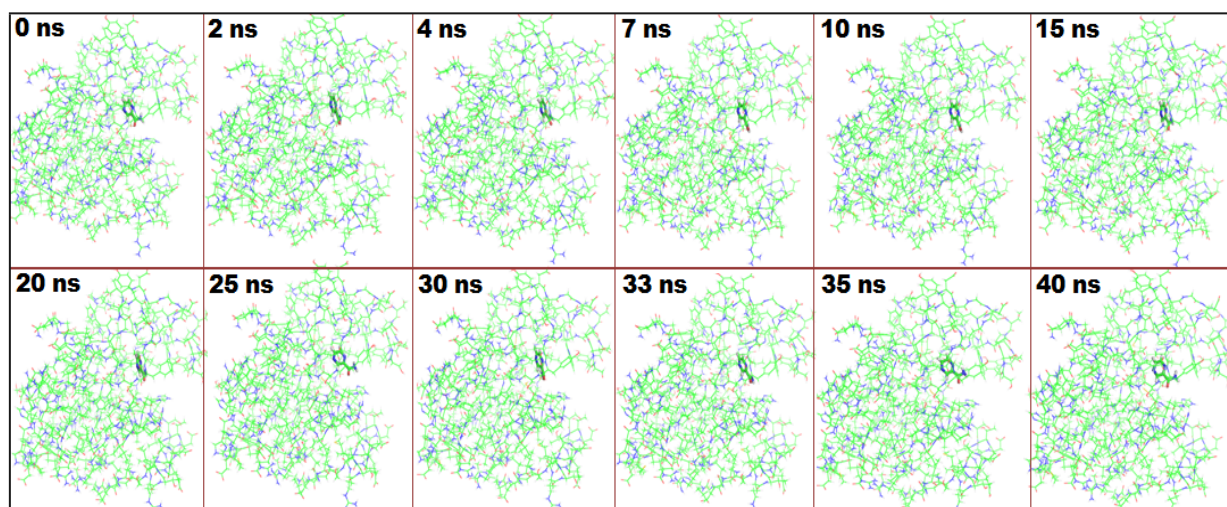

**Fig. S5.** The snapshots corresponding to simulation of PZA/pncA protein with PZA docked within the binding pocket of pncA for 40 ns time frame.

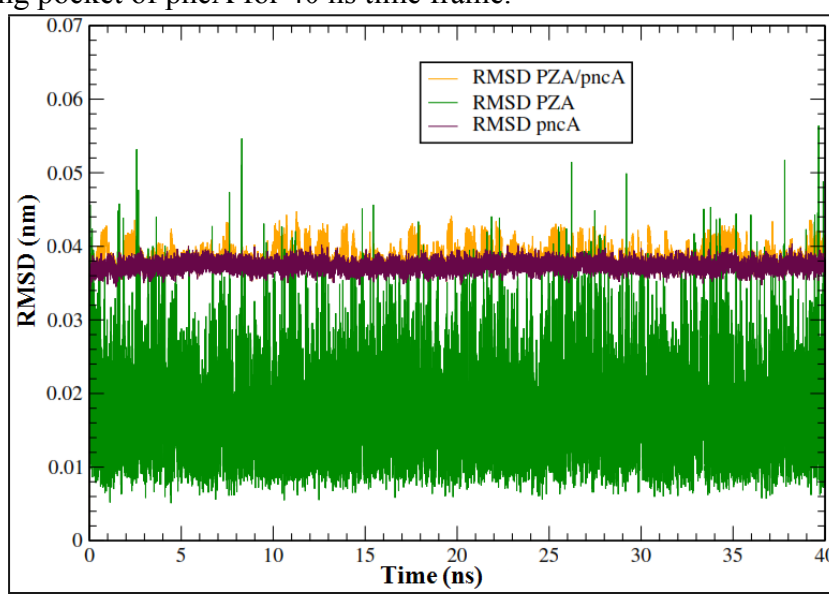

**Fig. S6.** The RMSD vs. time (ns) plot for PZA, pncA and PZA/pncA combined with PZA docked within the binding pocket of pncA.

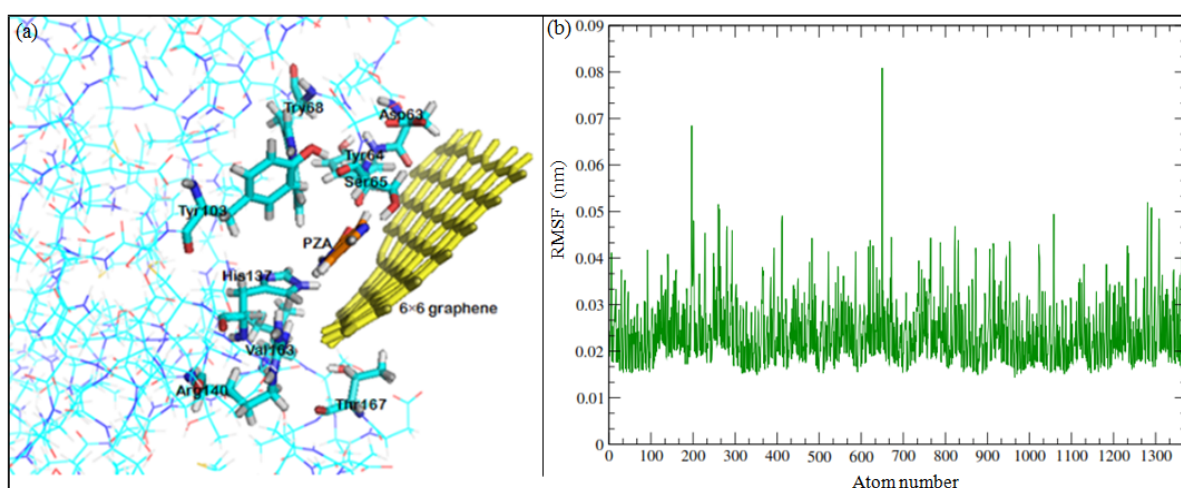

**Fig. S7.** (a) Interaction of PZA and graphene with some of the ligand binding residues of pncA, (b) RMSF of non H atoms of pncA with respect to the residue number of the protein atoms.
